# Supplementary material
Source: MDPI journal article supplement (https://www.mdpi.com/2073-4344/11/1/132)
Supplement: s1 [file s1]

**Biocatalysis for rare ginsenoside Rh2 production in high level  
with co-immobilized UDP-glycosyltransferase *Bs-YjiC* mutant  
and sucrose synthase *AtSuSy***

Jianlin Chu <sup>1</sup>, Jiheng Yue <sup>2</sup>, Song Qin <sup>1</sup>, Yuqiang Li <sup>2</sup>, Bin Wu <sup>2,\*</sup>, Bingfang He <sup>1,\*</sup>

<sup>1</sup> School of Pharmaceutical Sciences, Nanjing Tech University, No. 30 Puzhu  
South Road, Jiangbei New Area, Nanjing 211800, China.

<sup>2</sup> College of Biotechnology and Pharmaceutical Engineering, Nanjing Tech  
University, No. 30 Puzhu South Road, Jiangbei New Area, Nanjing 211800,  
China.

\* Correspondence: wubin1977@njtech.edu.cn; bingfanghe@njtech.edu.cn;

Tel.: +86-025-58139902

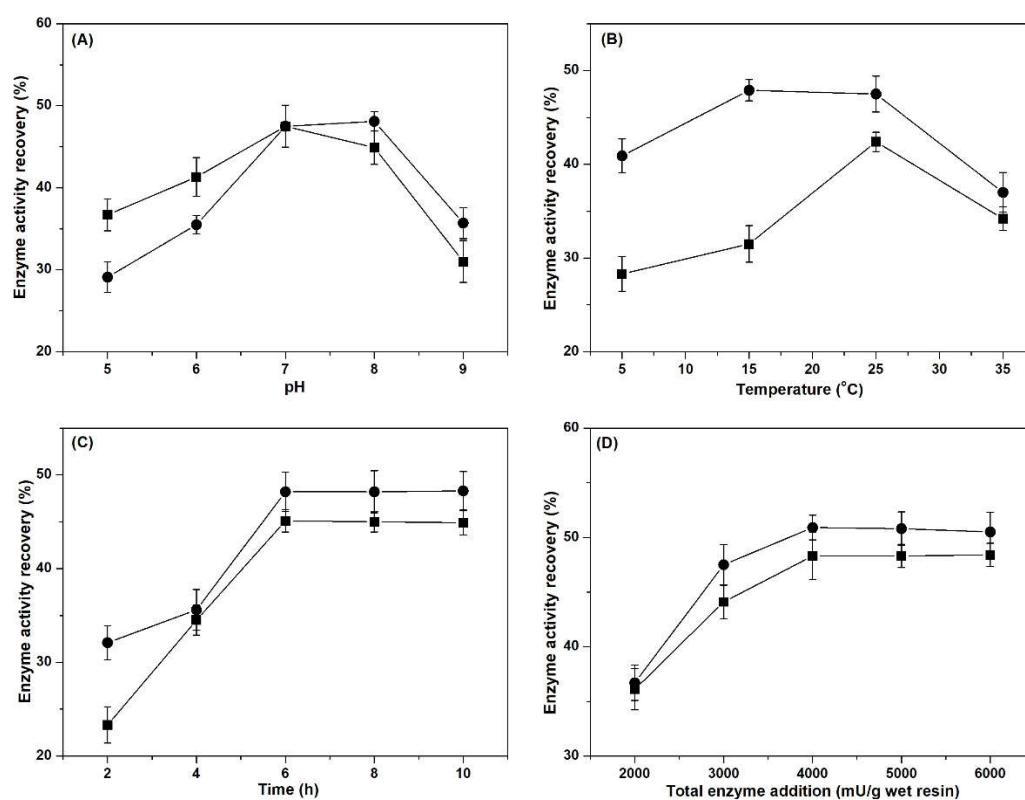

**Figure S1** optimization of the adsorbed condition for enzymes of M315F (●) and AtSuSy (■) bound. Influence of pH (A), temperature (B), adsorption time (C) and total enzyme addition (D) on the bienzyme coimmobilization.

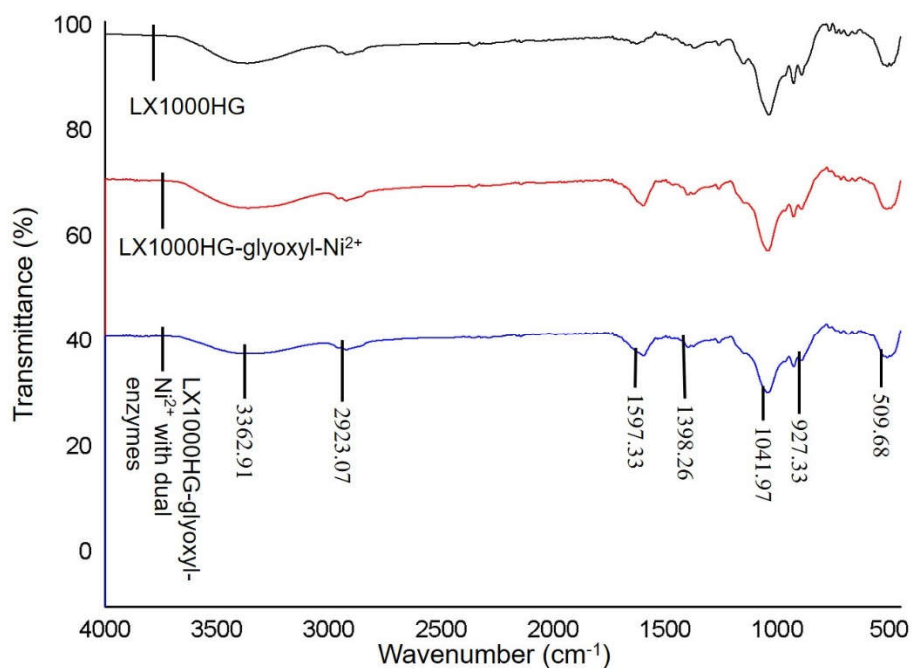

**Figure S2** FTIR spectra of resin LX1000HG, LX1000HG-glyoxyl-Ni<sup>2+</sup> and LX1000HG-glyoxyl-Ni<sup>2+</sup> with enzymes. The absorption peak 1398 cm<sup>-1</sup> are the deformation vibration of -NH- bending of the amide. The enzymes immobilized resin had a characteristic peak at 1597 cm<sup>-1</sup>, suggesting the enzymes were binding onto the supports.

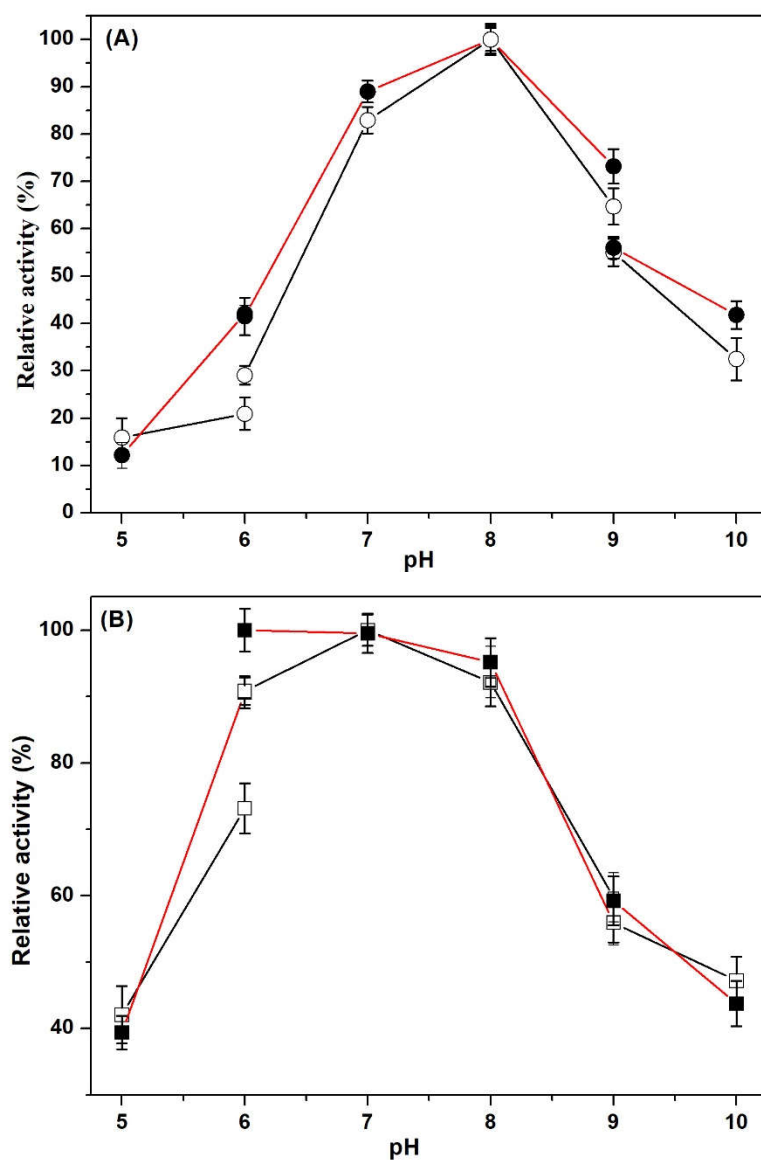

**Figure S3** Effect of pH on the activities of free and immobilized enzyme M315F/*AtSuSy*: (A) Effect of pH on the activities of free enzyme M315F (○) and immobilized enzyme M315F (●), and (B) Effect of pH on the activities of free enzyme *AtSuSy* (□) and immobilized enzyme *AtSuSy* (■).

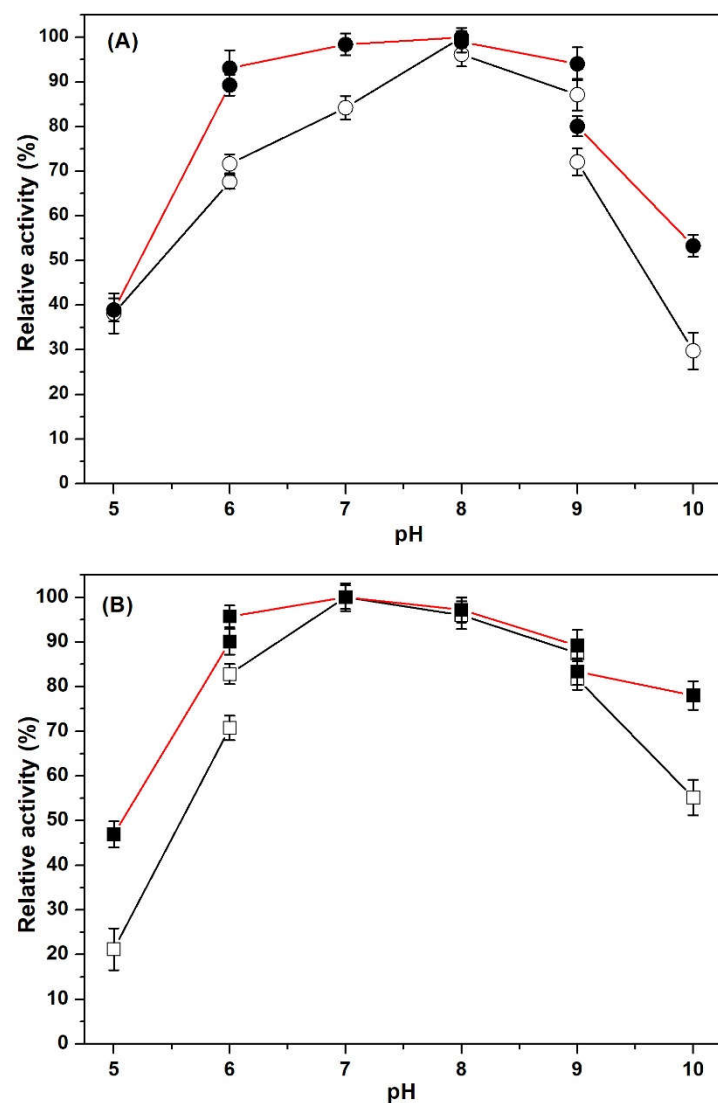

**Figure S4** pH stability of free and immobilized enzyme M315F/*AtSuSy*: (A) pH stability of free enzyme M315F (○) and immobilized enzyme M315F (●), and (B) pH stability of free enzyme *AtSuSy* (□) and immobilized enzyme *AtSuSy* (■).

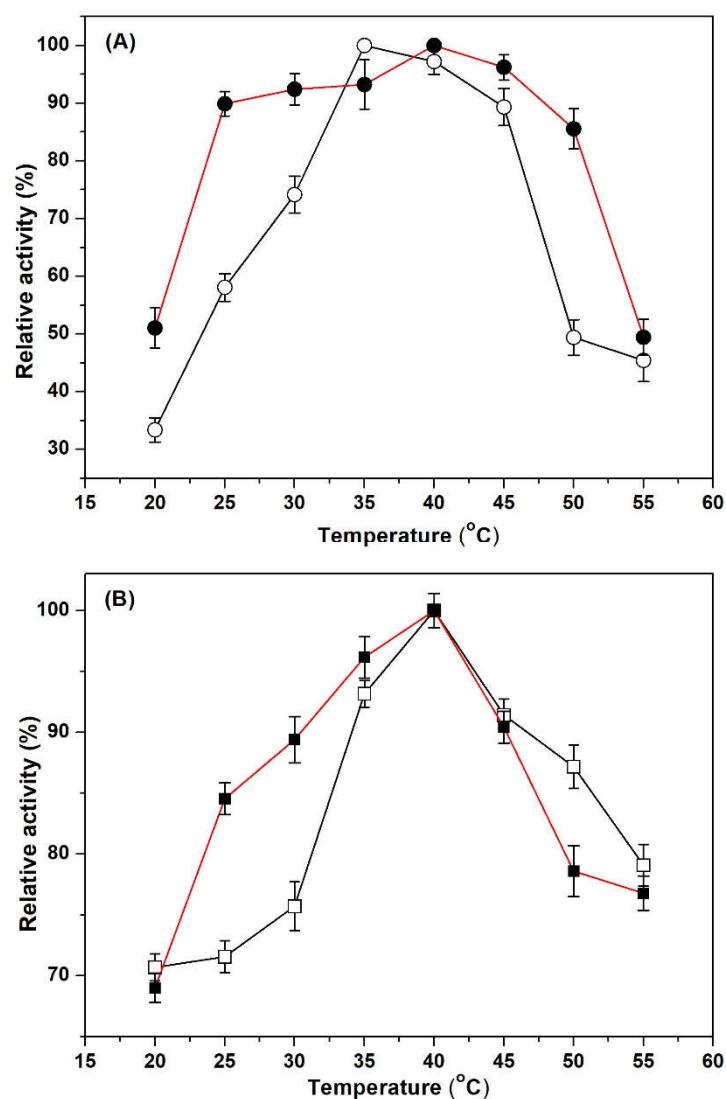

**Figure S5** Effect of temperature on the activities of free and immobilized enzyme M315F/*AtSuSy*: **(A)** Effect of temperature on the activities of free enzyme M315F (○) and immobilized enzyme M315F (●), and **(B)** Effect of temperature on the activities of free enzyme *AtSuSy* (□) and immobilized enzyme *AtSuSy* (■).

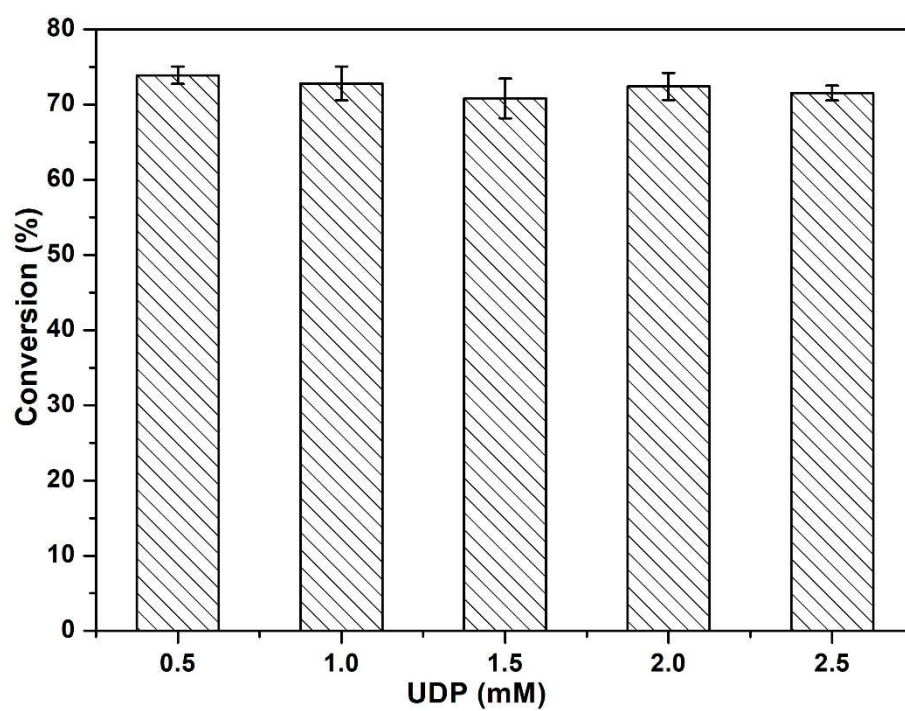

**Figure S6** Effect of UDP concentration on the immobilized M315F and *AtSuSy* coupled reactions for Rh2 synthesis

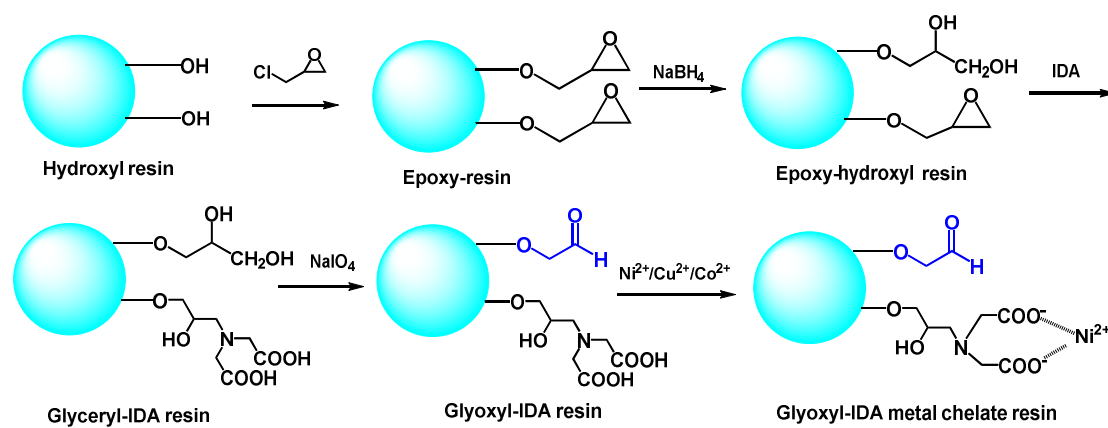

**Figure S7** Activation procedure for heterofunctional resin preparation
